# Supplementary material
Source: publisher figshare collection journal article supplement (https://tandf.figshare.com/ndownloader/files/21642318)
Supplement: Supplementary file 1 [file 21642318]

SUPPLEMENTAL MATERIAL

S3. The figure shows a comparison between SOSMA and GFC datasets. The circles in the figure represent the location of deforestation patches of natural forest. GFC mapped 702 patches smaller than 3 ha (red) and 46 bigger than 3 ha (orange). SOSMA (purple) mapped 37 patches only, all of them bigger than 3 ha. It is important to note that some agglomeration of patches smaller than 3 ha mapped by GFC in the same year add to areas bigger than 3 ha, but we kept them individually.
